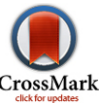

## Correction

# Correction: Laser-Supported CD133+ Cell Therapy in Patients with Ischemic Cardiomyopathy: Initial Results from a Prospective Phase I Multicenter Trial

The *PLOS ONE* Staff

## Notice of Republication

This article was republished on August 7, 2014, to replace incorrectly changed characters in the byline. The publisher apologizes for the error. Please download this article again to view the correct version. The originally published, uncorrected article and the republished, corrected article are provided here for reference.

## Supporting Information

**File S1.** Originally published, uncorrected article.  
(PDF)

**File S2.** Republished, corrected article.  
(PDF)

## Reference

1. Assmann A, Heke M, Kröpil P, Ptak L, Hafner D, et al. (2014) Laser-Supported CD133+ Cell Therapy in Patients with Ischemic Cardiomyopathy: Initial Results from a Prospective Phase I Multicenter Trial. *PLoS ONE* 9(7): e101449. doi:10.1371/journal.pone.0101449

**Citation:** The *PLOS ONE* Staff (2014) Correction: Laser-Supported CD133+ Cell Therapy in Patients with Ischemic Cardiomyopathy: Initial Results from a Prospective Phase I Multicenter Trial. *PLoS ONE* 9(8): e107082. doi:10.1371/journal.pone.0107082

**Published:** August 25, 2014

**Copyright:** © 2014 The *PLOS ONE* Staff. This is an open-access article distributed under the terms of the Creative Commons Attribution License, which permits unrestricted use, distribution, and reproduction in any medium, provided the original author and source are credited.
